# Supplementary material
Source: publisher figshare collection journal article supplement (https://acs.figshare.com/ndownloader/files/4290334)
Supplement: Supplementary file 1 [file 4290334]

## Supporting Information

# Synthesis of Novel Vitamin K<sub>2</sub> Analogues with Modification at the $\omega$ -Terminal Position and their Biological Evaluation as Potent Steroid and Xenobiotic Receptor (SXR) Agonists

*Yoshitomo Suhara, Masato Watanabe, Kimie Nakagawa, Akimori Wada, Yoichi Ito, Kazuyoshi Takeda, Kazuhiko Takahashi, and Toshio Okano*

## Contents:

|                                                                             |         |
|-----------------------------------------------------------------------------|---------|
| I. <sup>1</sup> H and <sup>13</sup> C NMR chart of compound 10 and 11 ..... | S2 - S3 |
| II. A comprehensive statement of confirming purity and the method .....     | S4      |
| III. HPLC data of compound 3 - 11 used in biological assays .....           | S5 - S9 |
| IV. Synthetic procedure of compound 15a and 15b .....                       | S10     |

<sup>1</sup>H NMR chart of compound **10**

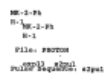

| SUMMARY       |             | SPECIAL |            |
|---------------|-------------|---------|------------|
| date          | NOV 11 1956 | swap    | not used   |
| account       | edc23       | gen     | not used   |
| file          | acq         | spcl    | 16         |
| ACQUISITION   |             |         |            |
| aw            | 7396.8      | wp39    | 31,000     |
| ac            | 3074.4      | afca    | 6,400      |
| fb            | 4080.1      |         | PLANS      |
| cc            | 32          | in      | 0          |
| de            | 5           | de      | 7          |
| el            | 1,660.4     |         |            |
| ec            |             |         | PROCESSING |
| transmitter   | 2           | in      | 0.26       |
|               |             | cu      | 5523.6     |
| ta            | 83          |         | DISPENS    |
| mfrc          | 499,034     | ap      | 0.0        |
| uapw          | 88          |         | 2700       |
| uapw          | 88          | efl     | 3806.8     |
| pw            | 5,584       | rfp     | 0          |
| DECOMPOSITION |             |         |            |
| du            | C33         | lp      | -23.7      |
| duf           | 6           |         | PLAY       |
| du            | 244         | w       | 2700       |
| du            | 8           | e       | 8          |
| duw           | 34          | w       | 126        |
| duf           | 12404       |         |            |

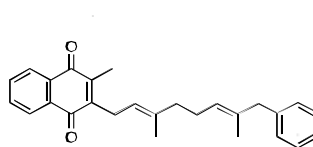

**10**

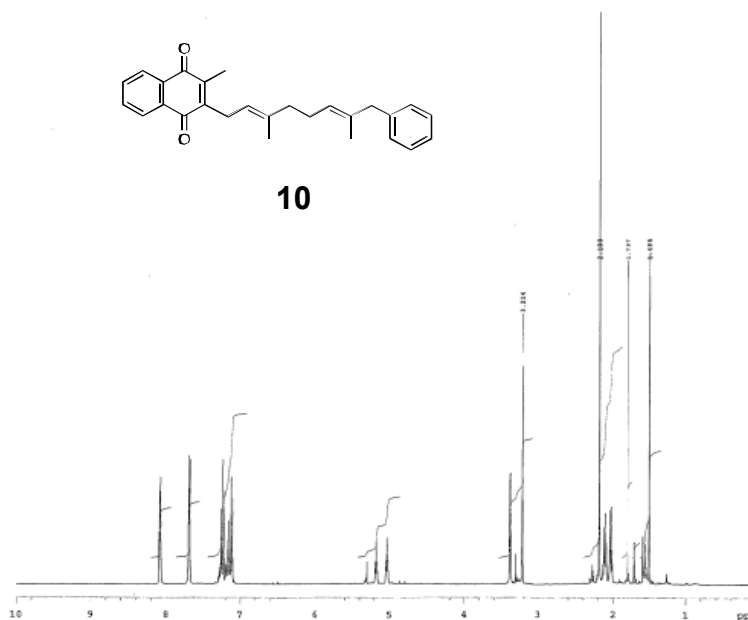

ME-2-FB  
C-13

exp34 Carbon

```

sigl4 carbon
=====
date Nov 11 2012 time not used
swagser edel3 gain 36
file acquisition exp gain 16
=====
sn 30165.9 gw90 39.000
sn 17682.1 gain 19.000
tp 70465 PLANE
sn 13000 k1
sn 12000 k2
cl 10000 k3
cl 9400 k4
sn 3584 ED
=====
TRANSMITTER lb PROCESSING
=====
un 173 fcs not used
un 125 fcs DISCARD
tsp 11050.4 kg -0.0
tsp 83 up 19150.8
pr 6.550 rT1 1915.0
=====
DECODEDUPERS ksp 0
=====
un k1 up -06.3
un k2 up -219.9
un 377 PLCT
dn w w 270
dn 3 w 675
dmf 11200 va 61754
=====
at cdc ph 98

```

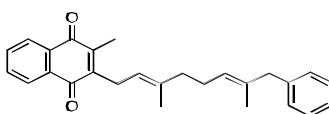

**10**

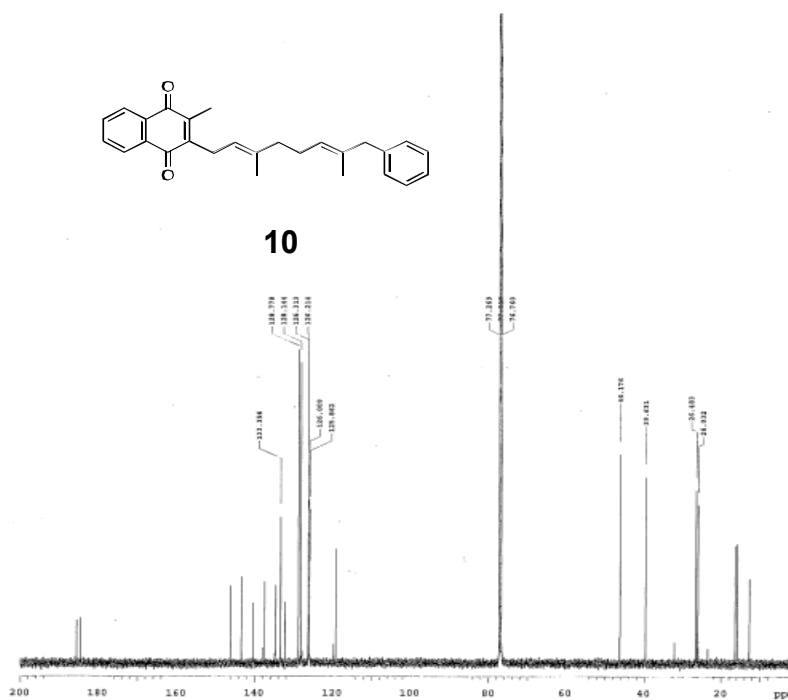



## II. A comprehensive statement of confirming purity and the method

The purity of compound **3-11** was confirmed by following method. The HPLC analyses were conducted with a Shimadzu HPLC system (Simadzu, Kyoto, Japan) consisting of a binary pump (LC-20AD liquid chromatography), an automatic solvent degasser (DGU-20A<sub>3</sub> degasser), and a manual injector. Separations were carried out using a reversed-phase C<sub>18</sub> analytical column (COSMOSIL 5C<sub>18</sub>-AR-II; 4.6 mm i.d. × 250 mm) (Nakalai tesque, Kyoto, Japan) with a solvent system consisting of an isocratic solvent. The solvent contained either methanol, ethanol, or water was delivered at 1.0 mL/min. This mobile phase was passed through the column at 1.0 mL/min. The column was maintained at 40 °C with a column oven (CTO-20A column oven). Vitamin K analogues were detected at 258 nm with an SPD-M20A diode array detector. The HPLC system was controlled by a CBM-20A System Controller (Shimadzu).

Table 1 overview the results of detection and the purity of the compound **3 – 11**. The purity of the each compound was calculated from a surface integral of detected peaks. Those purities were satisfied more than 95%.

**Table 1.** Results of HPLC detection and purity.

| compound  | isocratic solvent (v/v)           | retention time (min) | purity (%) |
|-----------|-----------------------------------|----------------------|------------|
| <b>3</b>  | MeOH / H <sub>2</sub> O = 90 : 10 | 6.838                | 99         |
| <b>4</b>  | MeOH / H <sub>2</sub> O = 95 : 5  | 7.568                | 98         |
| <b>5</b>  | MeOH / H <sub>2</sub> O = 95 : 5  | 11.963               | 96         |
| <b>6</b>  | MeOH                              | 9.115                | 99         |
| <b>7</b>  | MeOH / H <sub>2</sub> O = 80 : 20 | 9.760                | 96         |
| <b>8</b>  | MeOH / H <sub>2</sub> O = 90 : 10 | 8.273                | 97         |
| <b>9</b>  | MeOH / H <sub>2</sub> O = 90 : 10 | 15.604               | 98         |
| <b>10</b> | MeOH / H <sub>2</sub> O = 95 : 5  | 9.334                | 98         |
| <b>11</b> | MeOH / H <sub>2</sub> O = 95 : 5  | 15.406               | 99         |

### III. HPLC data of compound 3 - 11 used in biological assays

Sample: **3** (MK-1)

Sample Size: 20  $\mu$ L (2.1 mg / 2 mL-EtOH)

Column: 5C<sub>18</sub>-AR-II (nacalai tesque), 4.6  $\times$  250 mm

Eluant: MeOH / H<sub>2</sub>O = 90 : 10, isocratic flow

Flow Rate: 1.0 mL / min, Press.: 5.9 MPa, Temp.: 40°C

Detection: Ch.1 258 nm, Retention Time: 6.838 min

Purity: 99%

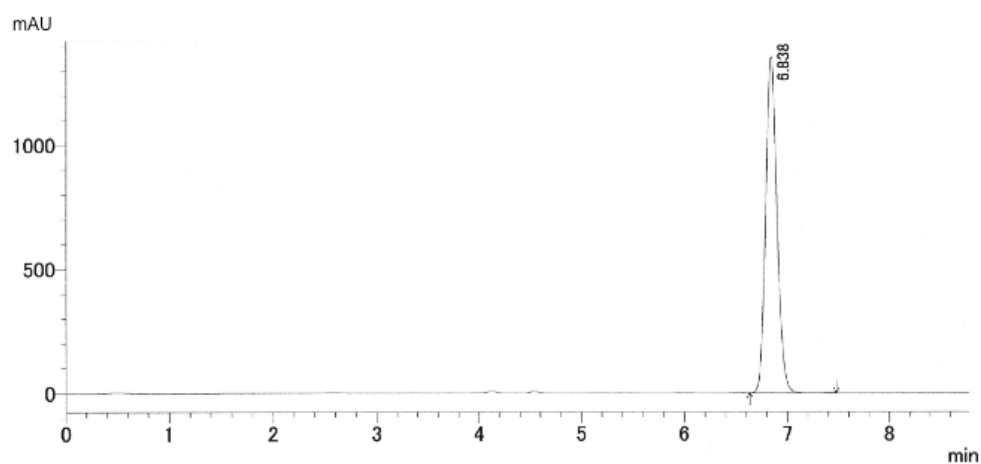

Sample: **4** (MK-2)

Sample Size: 20  $\mu$ L (3.2 mg / 2 mL-EtOH)

Column: 5C<sub>18</sub>-AR-II (nacalai tesque), 4.6  $\times$  250 mm

Eluant: MeOH / H<sub>2</sub>O = 95 : 5, isocratic flow

Flow Rate: 1.0 mL / min, Press.: 5.0 MPa, Temp.: 40°C

Detection: Ch.1 258 nm, Retention Time: 7.568 min

Purity: 98%

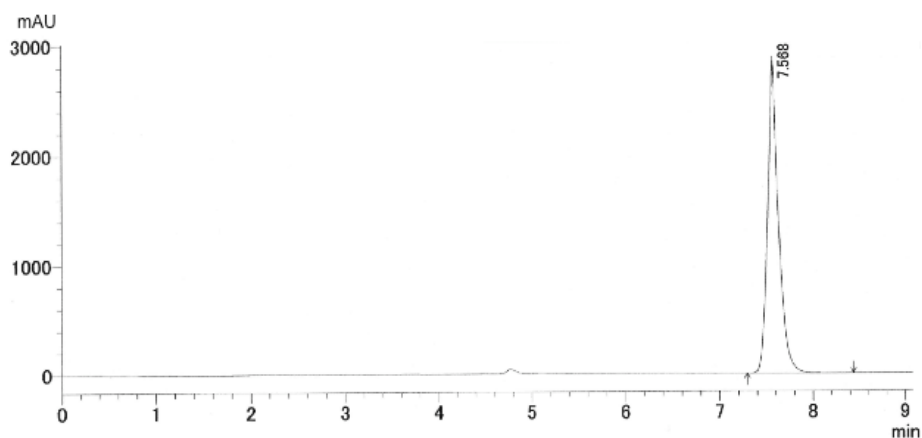

Sample: **5** (MK-3)

Sample Size: 20  $\mu$ L (3.0 mg / 2 mL-EtOH)

Column: 5C<sub>18</sub>-AR-II (nacalai tesque), 4.6  $\times$  250 mm

Eluant: MeOH / H<sub>2</sub>O = 95 : 5, isocratic flow

Flow Rate: 1.0 mL / min, Press.: 5.0 MPa, Temp.: 40°C

Detection: Ch.1 258 nm, Retention Time: 11.963 min

Purity: 96%

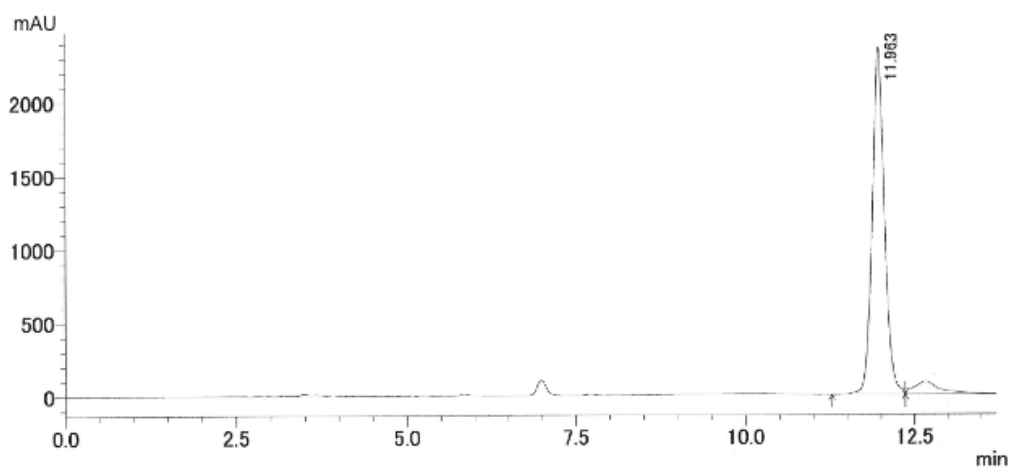

Sample: **6** (MK-4)

Sample Size: 20  $\mu$ L (0.9 mg / 2 mL-EtOH)

Column: 5C<sub>18</sub>-AR-II (nacalai tesque), 4.6  $\times$  250 mm

Eluant: MeOH, isocratic flow

Flow Rate: 1.0 mL / min, Press.: 5.0 MPa, Temp.: 40°C

Detection: Ch.1 258 nm, Retention Time: 9.115 min

Purity: 99%

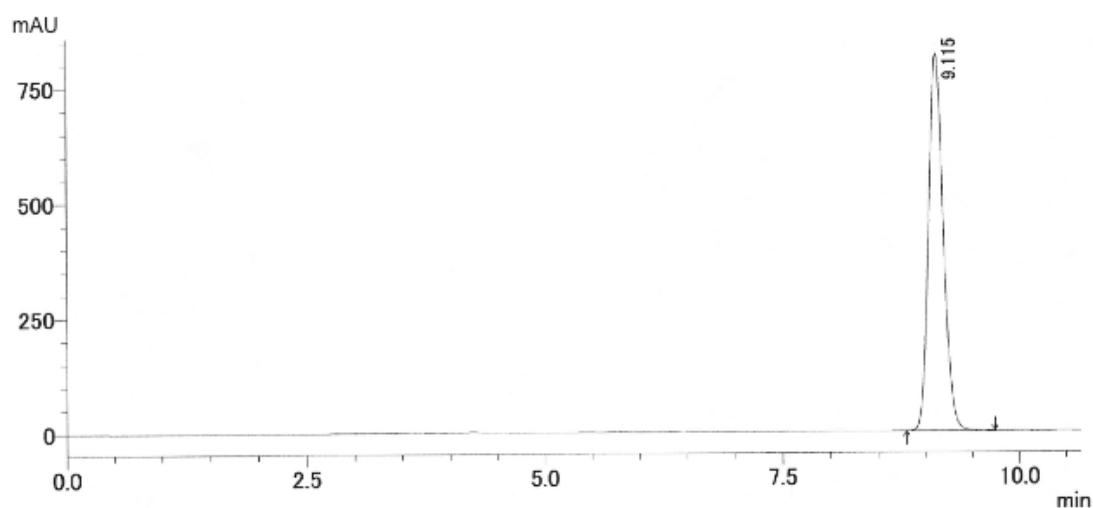

Sample: **7**

Sample Size: 20  $\mu$ L (0.2 mg / 2 mL-EtOH)

Column: 5C<sub>18</sub>-AR-II (nacalai tesque), 4.6  $\times$  250 mm

Eluant: MeOH / H<sub>2</sub>O = 80:20, isocratic flow

Flow Rate: 1.0 mL / min, Press.: 7.9 MPa, Temp.: 40°C

Detection: Ch.1 258 nm, Retention Time: 9.760 min

Purity: 96%

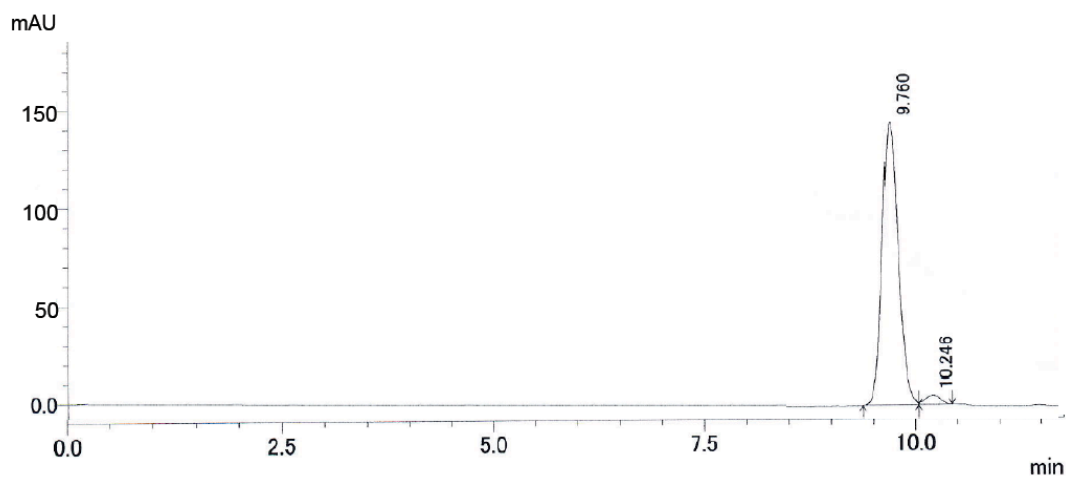

Sample: **8**

Sample Size: 20  $\mu$ L (0.3 mg / 2 mL-EtOH)

Column: 5C<sub>18</sub>-AR-II (nacalai tesque), 4.6  $\times$  250 mm

Eluant: MeOH / H<sub>2</sub>O = 90 : 10, isocratic flow

Flow Rate: 1.0 mL / min, Press.: 5.9 MPa, Temp.: 40°C

Detection: Ch.1 258 nm, Retention Time: 8.273 min

Purity: 97%

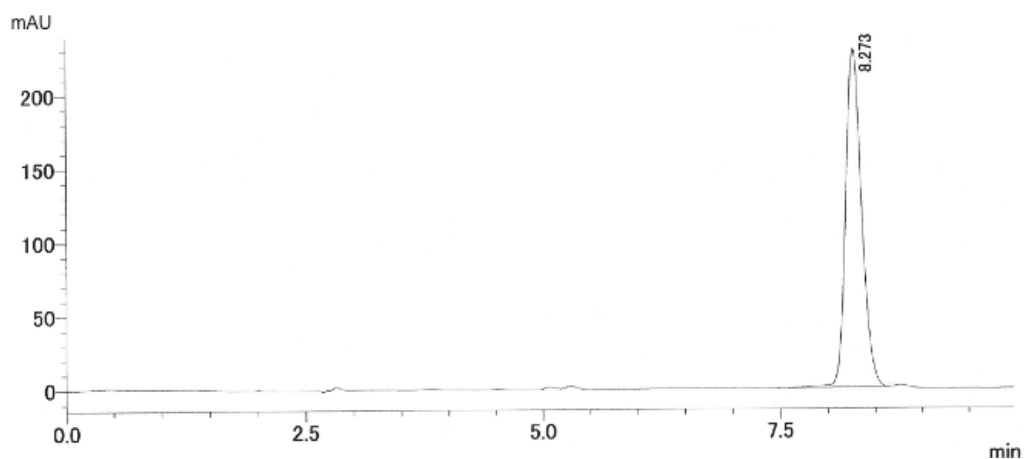

**Sample: 9**

Sample Size: 20  $\mu$ L (2.0 mg / 2 mL-EtOH)

Column: 5C<sub>18</sub>-AR-II (nacalai tesque), 4.6  $\times$  250 mm

Eluant: MeOH / H<sub>2</sub>O = 90 : 10, isocratic flow

Flow Rate: 1.0 mL / min, Press.: 5.9 MPa, Temp.: 40°C

Detection: Ch.1 258 nm, Retention Time: 15.604 min

Purity: 98%

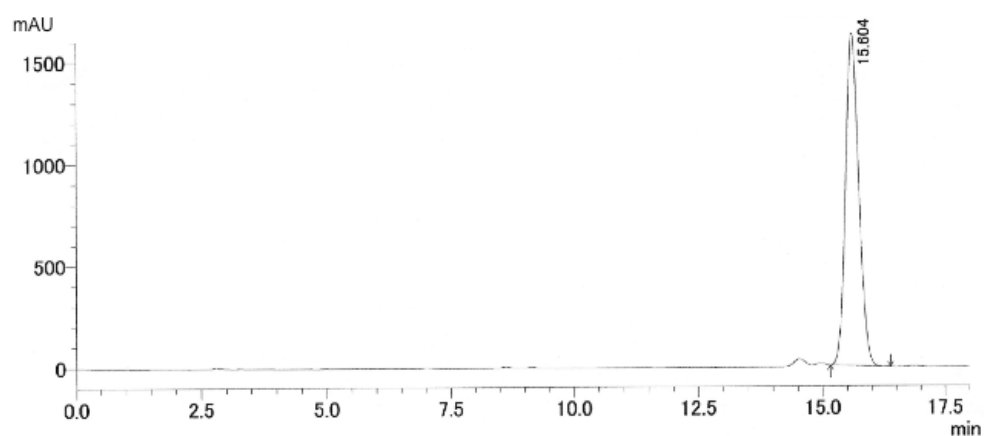

**Sample: 10**

Sample Size: 20  $\mu$ L (4.1 mg / 2 mL-EtOH)

Column: 5C<sub>18</sub>-AR-II (nacalai tesque), 4.6  $\times$  250 mm

Eluant: MeOH / H<sub>2</sub>O = 95 : 5, isocratic flow

Flow Rate: 1.0 mL / min, Press.: 5.0 MPa, Temp.: 40°C

Detection: Ch.1 258 nm, Retention Time: 9.334 min

Purity: 98%

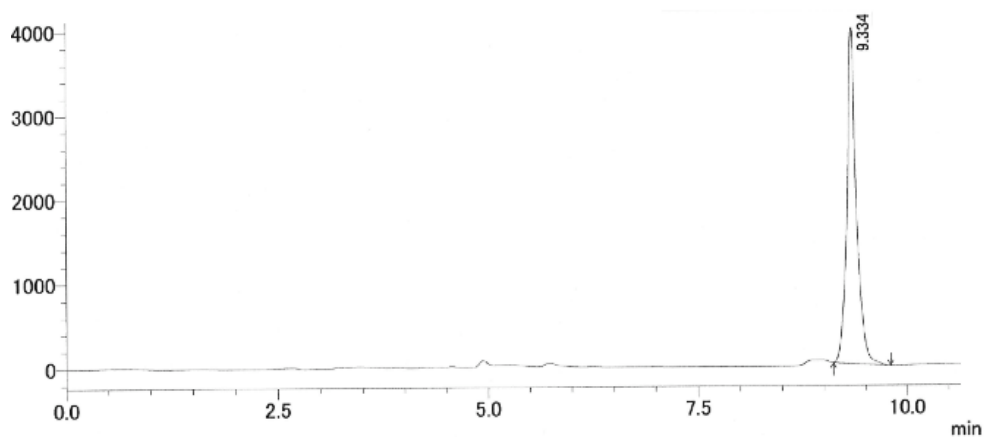



Sample: **11**

Sample Size: 20  $\mu$ L (3.8 mg / 2 mL-EtOH)

Column: 5C<sub>18</sub>-AR-II (nacalai tesque), 4.6  $\times$  250 mm

Eluant: MeOH / H<sub>2</sub>O = 95 : 5, isocratic flow

Flow Rate: 1.0 mL / min, Press.: 5.0 MPa, Temp.: 40°C

Detection: Ch.1 258 nm, , Retention Time: 15.406 min

Purity: 99%

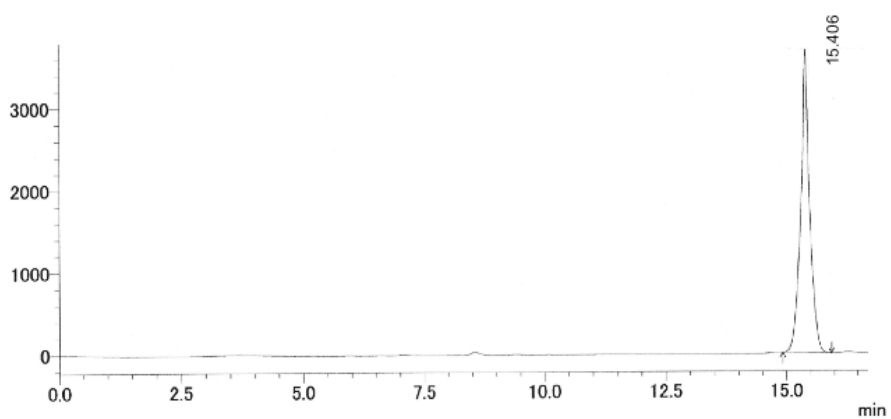

#### IV. Experimental method and data of compound **15a** and **15b**

**Synthesis of compounds 15a and 15b.** Commercially available phenylmagnesium bromide (7.6 mL of a 3.0 M solution, 22.4 mmol) was added dropwise to a mixture of THP ether **14a** (538 mg, 2.12 mmol) or **14b** (684 mg, 2.12 mmol) and copper (I) iodide (1.98 g, 10.4 mmol) in THF (40 mL) with stirring at room temperature. The resulting mixture was heated to 50°C and allowed to stir for 4 h. The reaction was then quenched by addition of saturated NH<sub>4</sub>Cl and extracted with ether. Concentration of the combined extracts *in vacuo* provided a yellow oil, which upon purification by flash column chromatography (60: 40 hexanes/ethyl acetate) afforded compound **15a** or **15b** as a colorless oil (**15a**: 368 mg, 76%, **15b**: 443 mg, 70%): The data of **15a** was reported in ref. 17. The data for **15b**: <sup>1</sup>H NMR (500 MHz, CDCl<sub>3</sub>) δ 7.28-7.18 (m, 5H), 5.43 (t, 1H, *J*= 1.2 Hz), 5.24 (t, 1H, *J*= 1.2 Hz), 5.13 (t, 1H, *J*= 1.2 Hz), 4.17 (d, 2H, *J*= 6.9 Hz), 3.28 (s, 2H), 2.12-2.04 (m, 8H), 1.69 (s, 3H), 1.61 (s, 3H), 1.54 (s, 3H); <sup>13</sup>C NMR (125 MHz, CDCl<sub>3</sub>) δ 140.4, 140.0, 135.2, 134.3, 129.5, 128.8 (2C), 128.1 (2C), 126.3, 125.8, 123.9, 123.1, 59.4, 46.2, 39.5, 26.8, 26.6, 16.2, 16.0, 15.8; ESI-HRMS (M+H<sup>+</sup>) *m/z* calcd for C<sub>21</sub>H<sub>30</sub>O 299.2375. Found 299.2377.
